# Supplementary material for: The Influence of Genetic Stability on Aspergillus fumigatus Virulence and Azole Resistance
Source: PubMed Central journal article supplement (PMC5765354; doi:10.1534/g3.117.300265), 2017-11-17
Supplement: 265FigureS4.pdf [file 265FigureS4.pdf]

A.

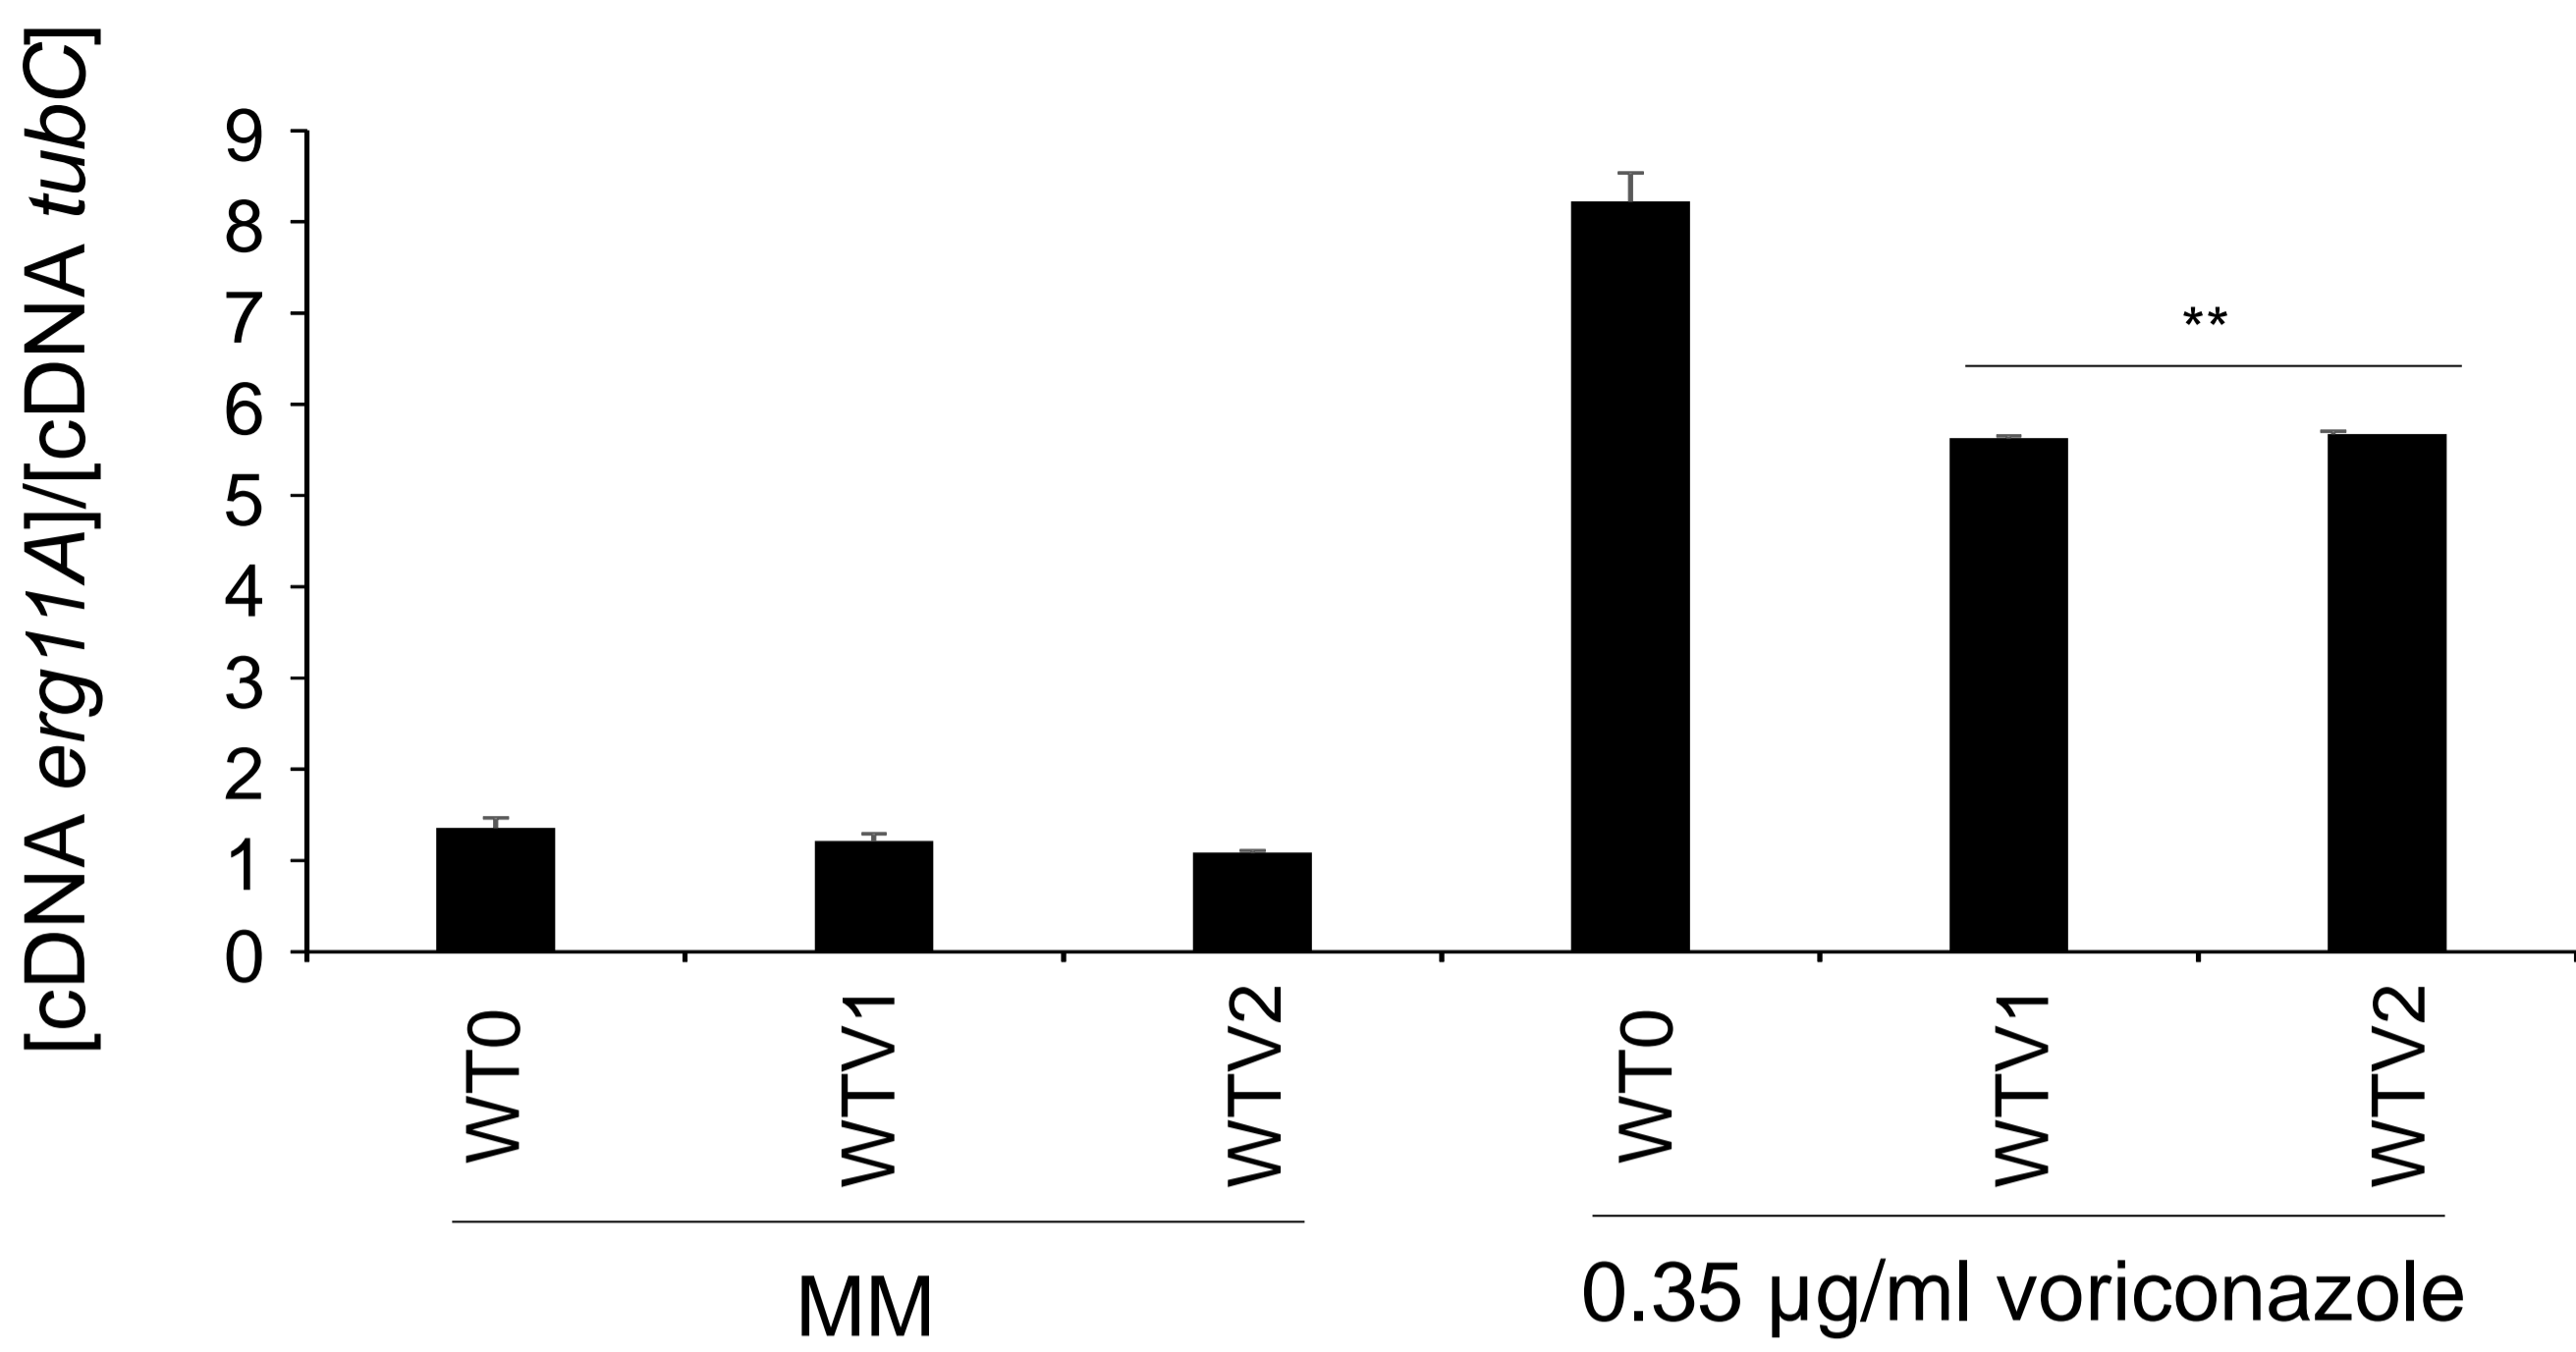

B.

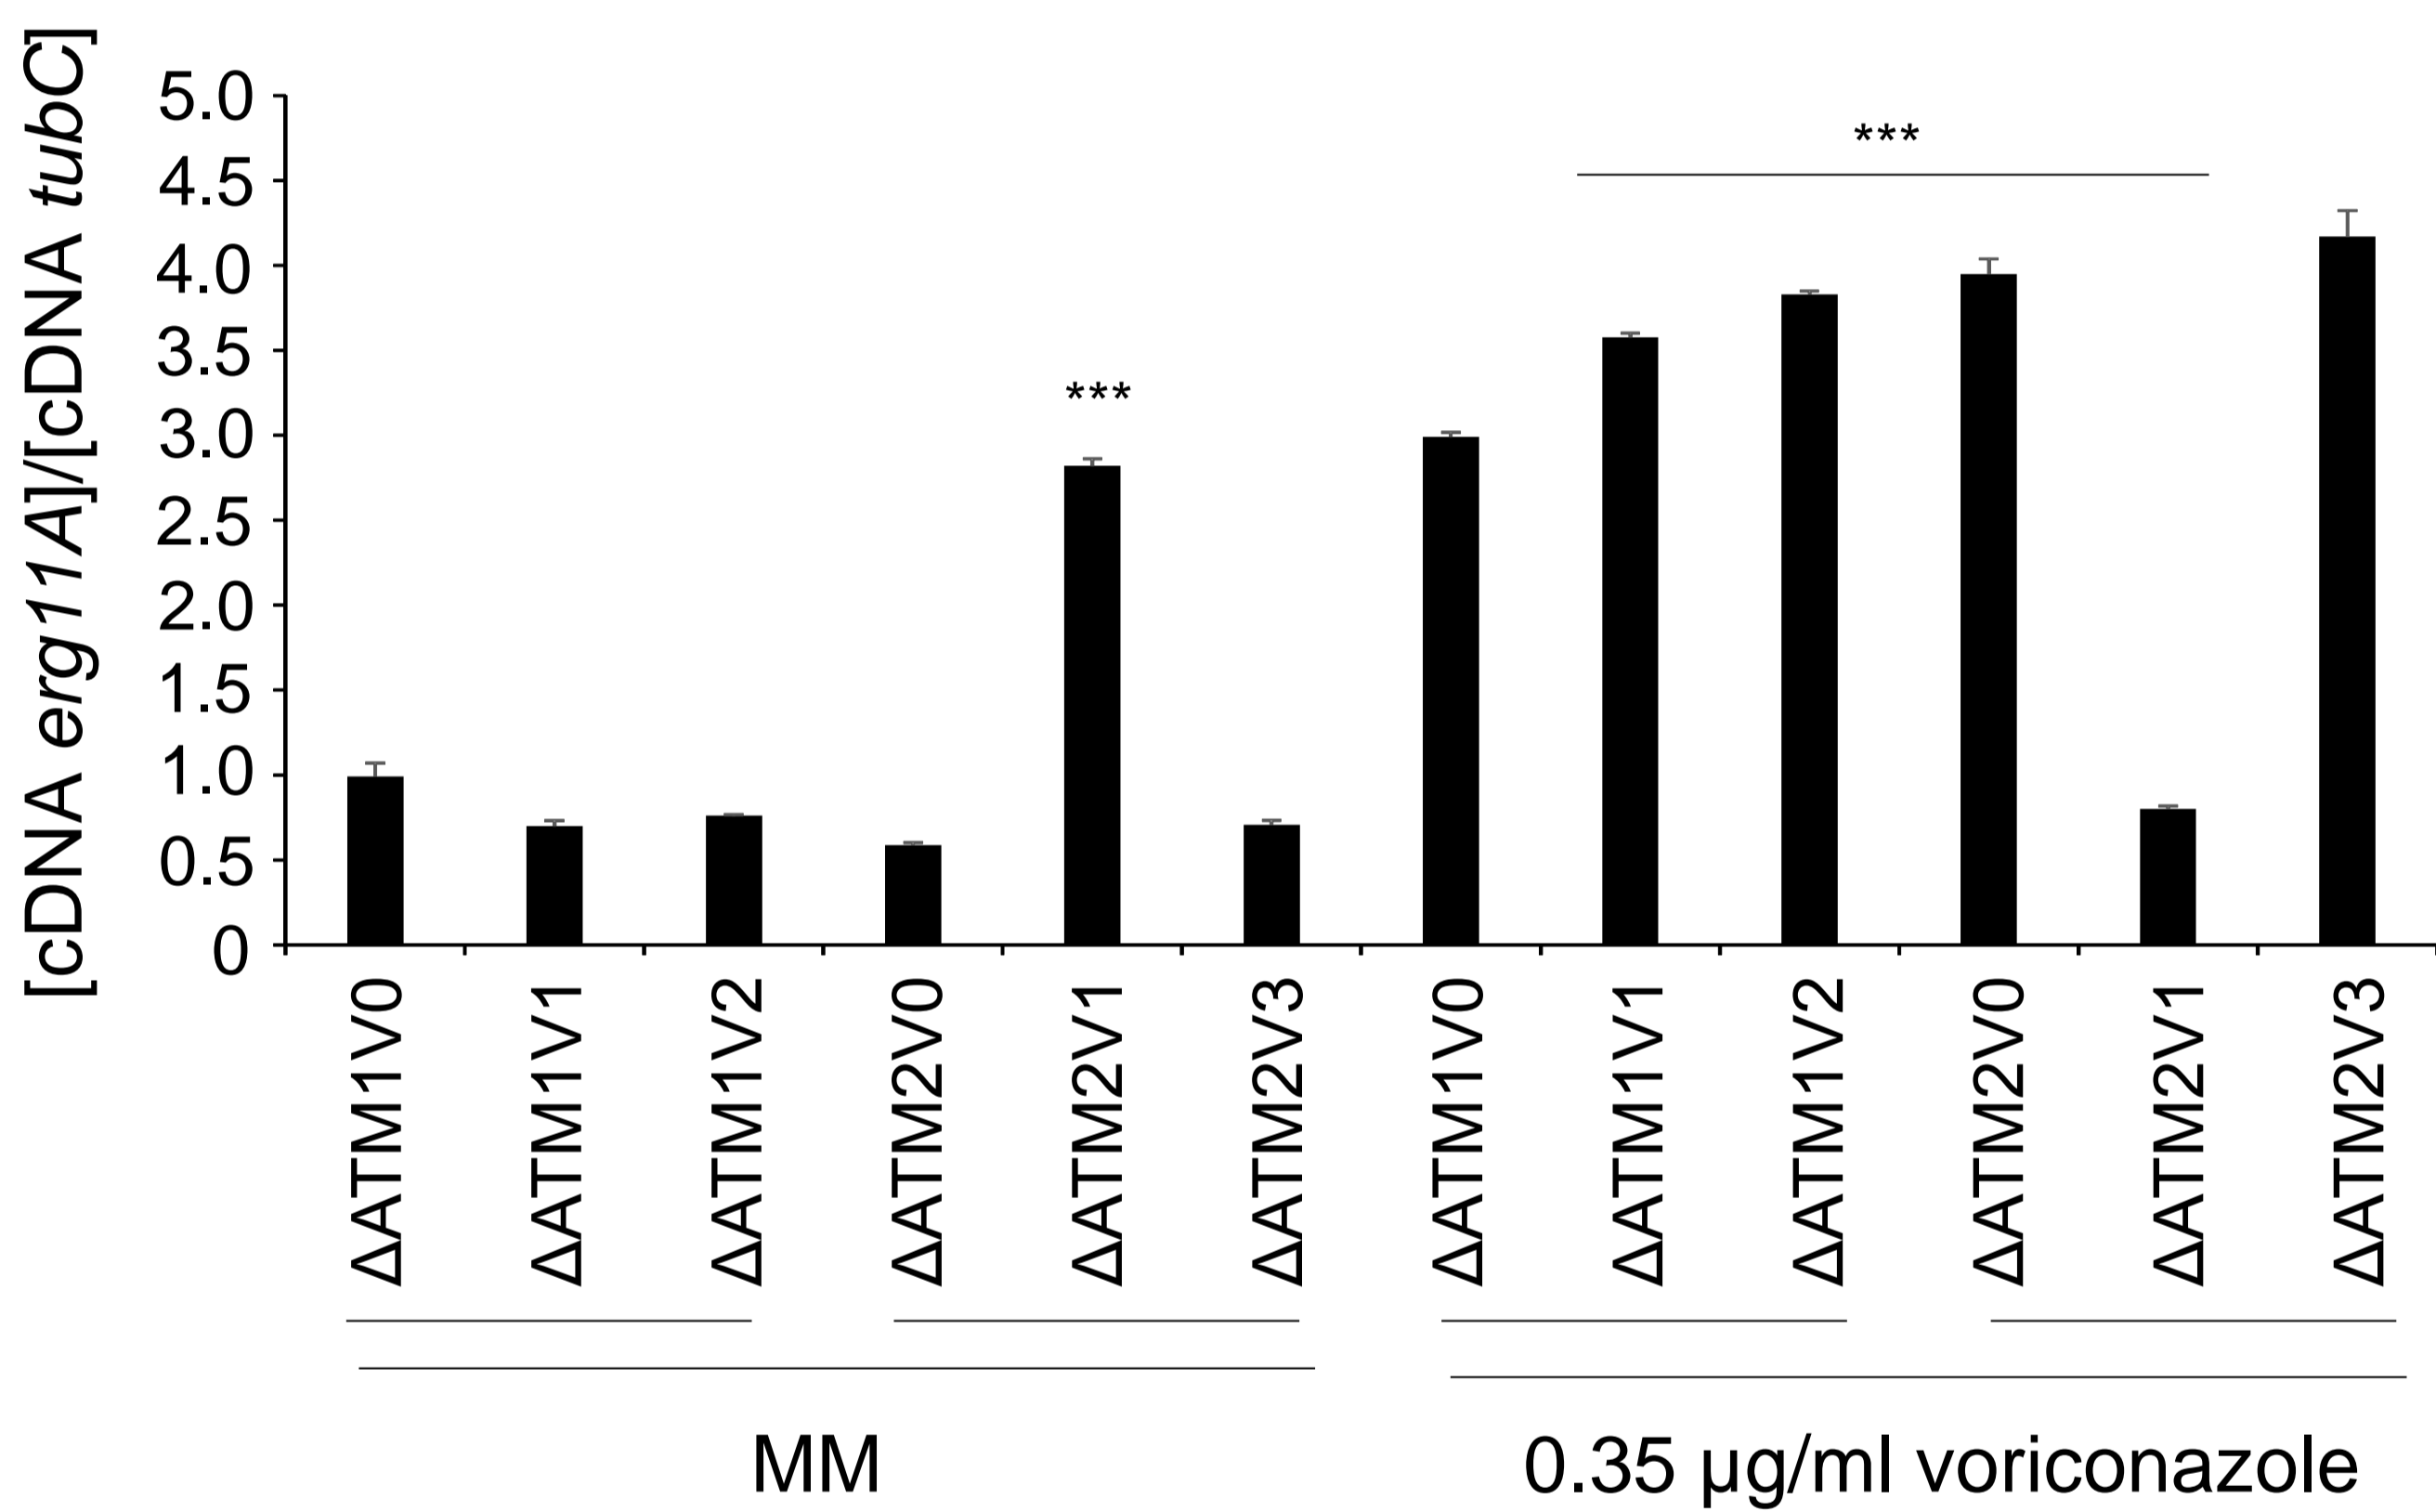

C.

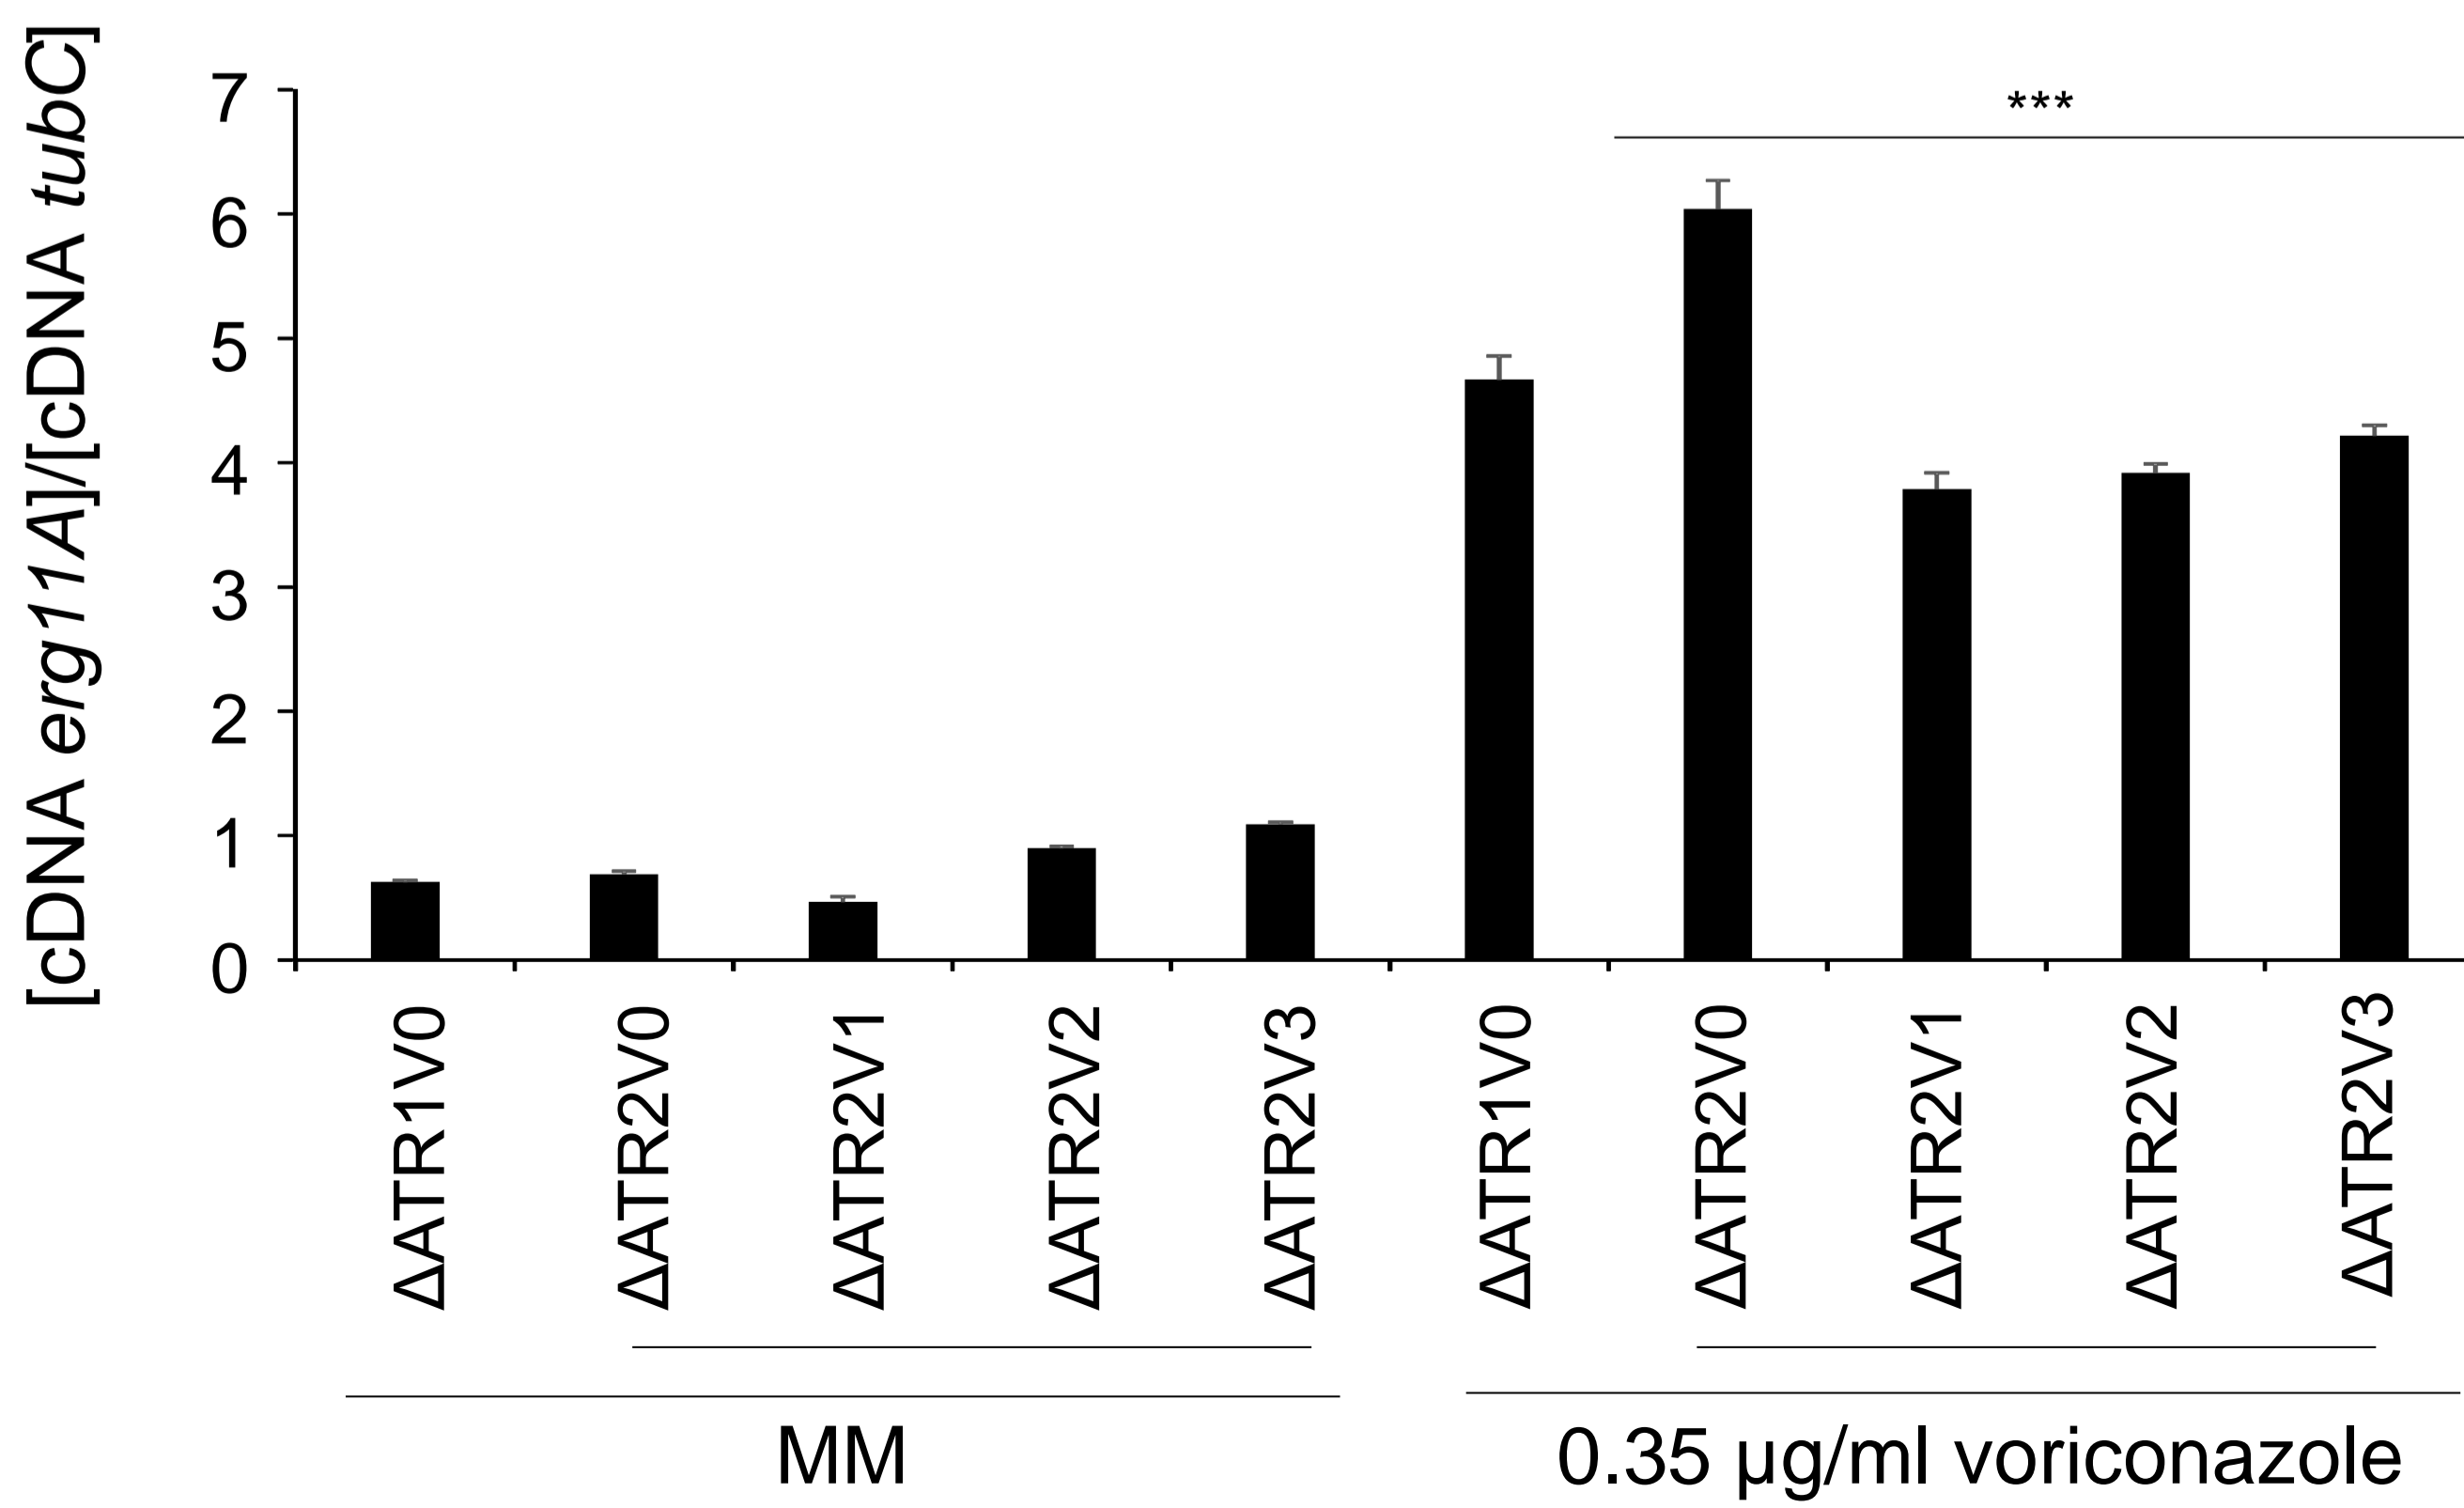

**Supplementary Figure S4** – The *erg11A* mRNA accumulation in *A. fumigatus* wild-type and mutant strains. (A-C) *A. fumigatus* strains were grown for 16 hours in MM and transferred to MM+0.35 µg/ml voriconazole for 1 hour. All gene expression was normalized by the amount of β-tubulin (*tubC*). Standard deviations present the average of three independent biological repetitions. Statistical analysis was performed using a one-way ANOVA test by comparing the exposed to respective the non-exposed strains to voriconazole (\*\*,  $p < 0.005$  and \*\*\*,  $p < 0.001$ ).
